# Supplementary material for: Hydrodynamically tunable optofluidic cylindrical microlens
Source: Royal Society of Chemistry journal article supplement (doi:10.1039/b708863a), 2007-01-01
Supplement: b708863a.pdf [file b708863a.pdf]

## Hydrodynamically tunable optofluidic cylindrical microlens

Xiaole Mao,<sup>ab</sup> John Robert Waldeisen,<sup>a</sup> Bala Krishna Juluri,<sup>a</sup> and Tony Jun Huang<sup>\*ab</sup>

<sup>a</sup> Department of Engineering Science and Mechanics, The Pennsylvania State University, University Park, PA 16802, USA. Fax: 814-865-9974; Tel: 814-863-4209; E-mail: junhuang@psu.edu

<sup>b</sup> Department of Bioengineering, The Pennsylvania State University, University Park, PA 16802, USA.

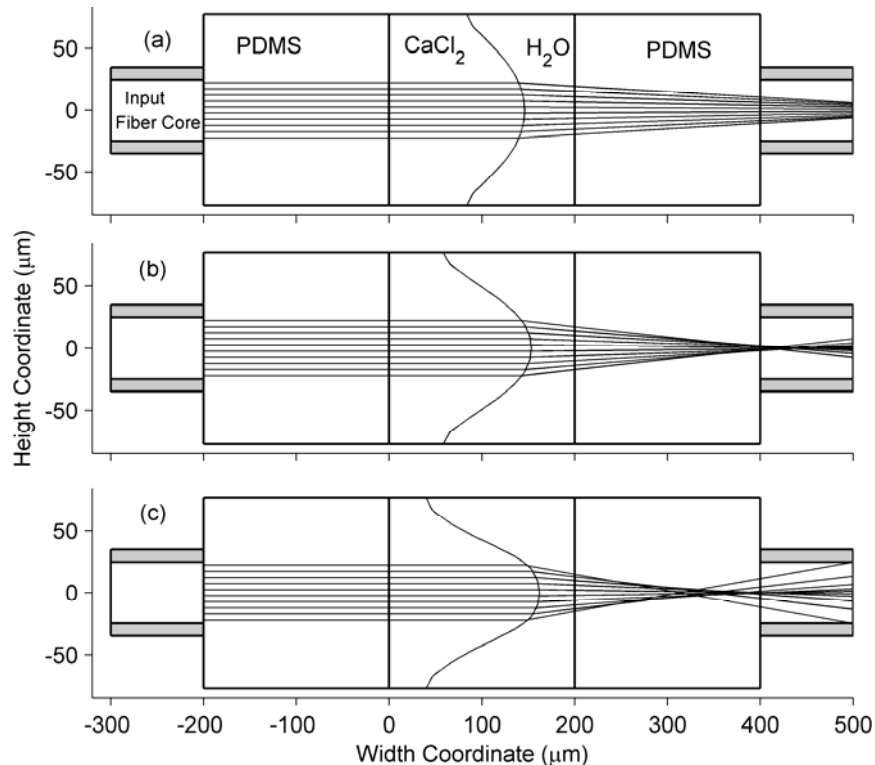

**Fig. 1S** Ray-tracing simulation for the focusing of perfectly parallel input light beams. The simulation reveals three different focusing patterns: (a) under-focused mode at the flow rate of 150  $\mu\text{l}/\text{min}$ , (b) well-focused mode at the flow rate of 250  $\mu\text{l}/\text{min}$ , and (c) over-focused mode at the flow rate of 350  $\mu\text{l}/\text{min}$ . Less aberration is observed in this case as compared to the simulation with divergent input beams (Fig. 4b)

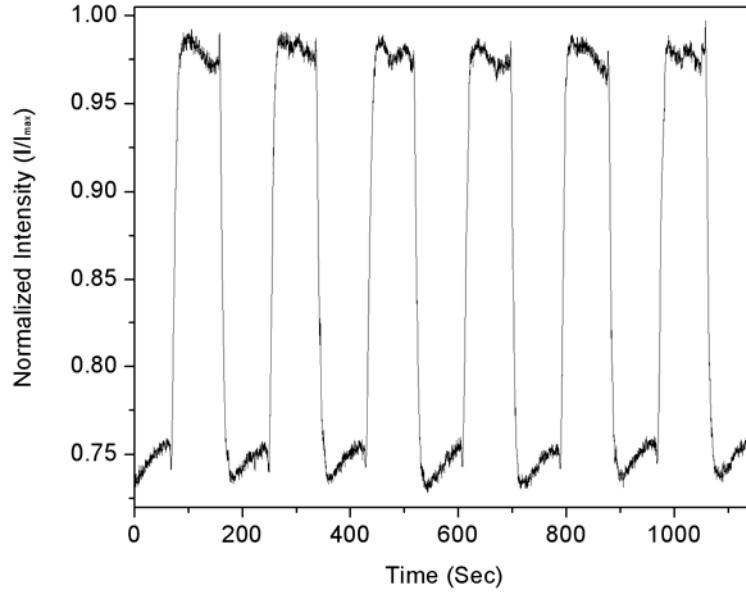

**Fig. 2S** Changes in the measured output intensity as a result of switching the flow rate between 50  $\mu\text{l}/\text{min}$  and 150  $\mu\text{l}/\text{min}$  at 90 second intervals.

A normalized light intensity vs. time profile, in which the flow rate oscillated between 50  $\mu\text{l}/\text{min}$  and 150  $\mu\text{l}/\text{min}$  at 90 second intervals, is shown in Fig. 2S. The profile shows that a new microlens configuration can be established within several seconds in response to the switching of flow rate. The results illustrate the stable and repeatable switching nature of our optofluidic microlens, thus proving the robustness of the tuning mechanism.
